# Supplementary material for: Test-Retest Reliability of Resting Brain Small-World Network Properties across Different Data Processing and Modeling Strategies
Source: MDPI journal article supplement (doi:10.3390/brainsci13050825), 2023-05-19
Supplement: s1 [file s1]

**Table S1**

Pair-wise differences of the betweenness centrality ICC among eight strategies.

| Betweenness Centrality | BNG90    | BG90      | WNG90   | WG90      | BNG264   | BG264     | WNG264   | WG264 |
|------------------------|----------|-----------|---------|-----------|----------|-----------|----------|-------|
| BNG90                  |          |           |         |           |          |           |          |       |
| BG90                   | 0.097**  |           |         |           |          |           |          |       |
| WNG90                  | 0.025    | -0.072    |         |           |          |           |          |       |
| WG90                   | 0.079*   | -0.018    | 0.054   |           |          |           |          |       |
| BNG264                 | -0.048   | -0.145*** | -0.073* | -0.127*** |          |           |          |       |
| BG264                  | 0.094*** | -0.003    | 0.069*  | 0.015     | 0.142*** |           |          |       |
| WNG264                 | -0.012   | -0.109*** | -0.037  | -0.091*** | 0.036    | -0.106*** |          |       |
| WG264                  | 0.071*   | -0.026    | 0.0467  | -0.007    | 0.120*** | -0.022    | 0.083*** |       |

*Note:* BNG90: binary + no global signal regression + AAL90, BG90: binary + global signal regression + AAL90, WG90: weighted + global signal regression + AAL90, BNG264: binary + no global signal regression + POWER264, BG264: binary + global signal regression + POWER264, WNG90: weighted + no global signal regression + AAL90, WG264: weighted + global signal regression + POWER264, WNG264: weighted + no global signal regression + POWER264. \*:  $p < 0.05$ , \*\*:  $p < 0.01$ , \*\*\*:  $p < 0.001$ , Bonferroni corrected.

**Table S2**

Pair-wise differences of the degree centrality ICC among eight strategies.

| Degree Centrality | BNG90    | BG90   | WNG90    | WG90   | BNG264   | BG264     | WNG264   | WG264 |
|-------------------|----------|--------|----------|--------|----------|-----------|----------|-------|
| BNG90             |          |        |          |        |          |           |          |       |
| BG90              | 0.114*** |        |          |        |          |           |          |       |
| WNG90             | -0.021   | -      |          |        |          |           |          |       |
| WG90              | 0.093**  | -0.020 | 0.114*** |        |          |           |          |       |
| BNG264            | -0.035   | -      | -0.014   | -      |          |           |          |       |
| BG264             | 0.058    | -0.056 | 0.078**  | -0.036 | 0.092*** |           |          |       |
| WNG264            | -0.061   | -      | -0.041   | -      | -0.027   | -0.119*** |          |       |
| WG264             | 0.062    | -0.051 | 0.083**  | -0.031 | 0.097*** | 0.005     | 0.123*** |       |

*Note:* BNG90: binary + no global signal regression + AAL90, BG90: binary + global signal regression + AAL90, WG90: weighted + global signal regression + AAL90, BNG264: binary + no global signal regression + POWER264, BG264: binary + global signal regression + POWER264, WNG90: weighted + no global signal regression + AAL90, WG264: weighted + global signal regression + POWER264, WNG264: weighted + no global signal regression + POWER264. \*:  $p < 0.05$ , \*\*:  $p < 0.01$ , \*\*\*:  $p < 0.001$ , Bonferroni corrected.

**Table S3**

Pair-wise differences of the nodal efficiency ICC among eight strategies.

| Nodal Efficiency | BNG90                | BG90                 | WNG90                | WG90                 | BNG264                | BG264                 | WNG264               | WG264 |
|------------------|----------------------|----------------------|----------------------|----------------------|-----------------------|-----------------------|----------------------|-------|
| BNG90            |                      |                      |                      |                      |                       |                       |                      |       |
| BG90             | 0.080 <sup>*</sup>   |                      |                      |                      |                       |                       |                      |       |
| WNG90            | -0.070               | -                    |                      |                      |                       |                       |                      |       |
| WG90             | 0.079 <sup>*</sup>   | -0.001               | 0.149 <sup>***</sup> |                      |                       |                       |                      |       |
| BNG264           | -0.026               | -                    | 0.044                | -                    |                       |                       |                      |       |
| BG264            | 0.060                | -0.020               | 0.129 <sup>***</sup> | -0.019               | 0.086 <sup>***</sup>  |                       |                      |       |
| WNG264           | -                    | -                    | -0.057               | -                    | -0.101 <sup>***</sup> | -0.186 <sup>***</sup> |                      |       |
| WG264            | 0.126 <sup>***</sup> | 0.206 <sup>***</sup> | 0.105 <sup>***</sup> | 0.206 <sup>***</sup> | 0.062 <sup>**</sup>   | -0.024                | 0.162 <sup>***</sup> |       |
